# Supplementary material for: In Vivo Stimulation of α- and β-Adrenoceptors in Mice Differentially Alters Small RNA Content of Circulating Extracellular Vesicles
Source: MDPI journal article supplement (doi:10.3390/cells10051211), 2021-05-15
Supplement: s1 [file s1]

## Supplementary

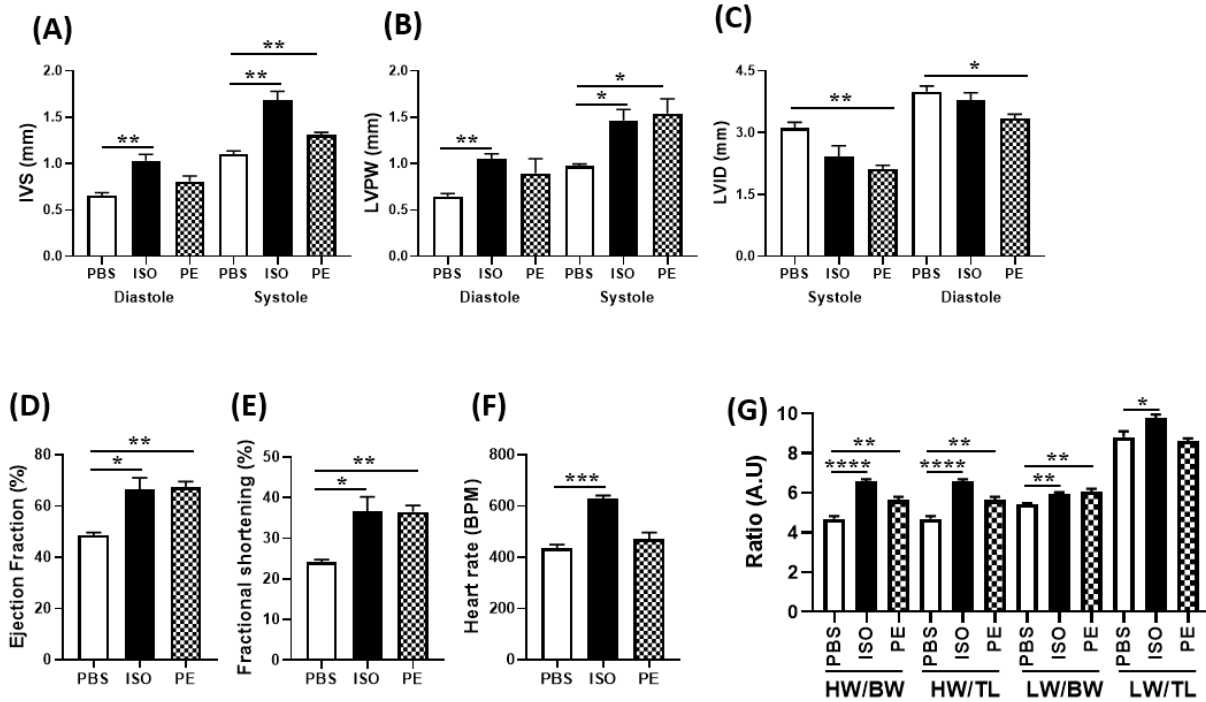

**Figure S1.** Basal characteristics of PBS, ISO and PE infusion mouse model to small RAN sequencing in blood extracellular vesicle (EV). A to F. Parameters of heart function measured by echocardiology. (A) Bar graph of Interventricular septal (IVS) end diastole and end systole (B) Left ventricular posterior wall (LVPW) end diastole and end systole. (C) Left ventricular internal diameter (LVID) end diastole and end systole. (D) and (E) Bar graph of Ejection fraction and Fraction shortening. (F) Bar graph of heart rate/min. (G) The ratio of heart weight (HW, mg) with body weight (BW, g) and tibia length (TL, mm). Mean  $\pm$  SE. PBS ( $n = 3$ ), ISO (10 mg/kg/day,  $n = 3$ ) and PE (3 omg/kg/day,  $n = 3$ ) infusion for 1 week. Mean  $\pm$  SE, \*  $p < 0.05$ , \*\*  $p < 0.01$ , \*\*\*  $p < 0.005$ , \*\*\*\*  $p < 0.001$ .

(A)

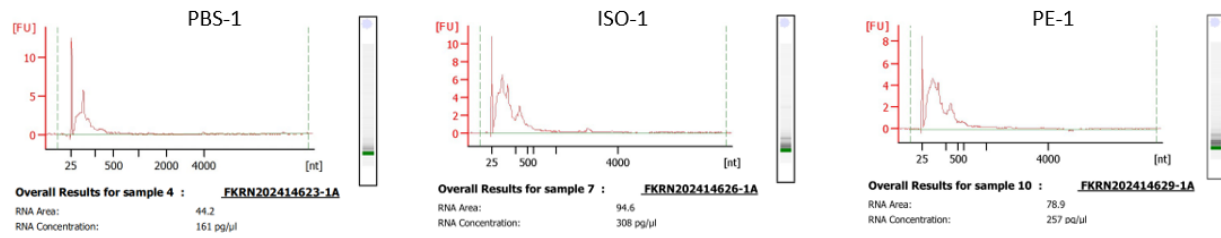

(B)

| Name  | Concentration (ng/ul) | Volume (ul) | Amounts (ug) |
|-------|-----------------------|-------------|--------------|
| PBS 1 | 0.161                 | 8           | 0.00129      |
| PBS 2 | 0.175                 | 9           | 0.00158      |
| PBS 3 | 0.289                 | 8           | 0.00231      |
| ISO 1 | 0.308                 | 9           | 0.00271      |
| ISO 2 | 0.32                  | 11          | 0.00352      |
| ISO 3 | 0.432                 | 11          | 0.00475      |
| PE 1  | 0.257                 | 9           | 0.00231      |
| PE 2  | 0.381                 | 9           | 0.00343      |
| PE 3  | 0.714                 | 8           | 0.00571      |

**Figure S2.** The length distribution and concentration of small RNAs in mouse blood EVs samples as detected by Agilent 2100 Bioanalyzer using small RNA chips. (A) Representative electropherograms and gel-like image of total RNA of mouse blood EVs with PBS, ISO (10 mg/kg/day) and PE (30 mg/kg/day) infusion for 1 week. (B) Table of the concentration of small RNA (25–200 nt) in each mouse blood EVs with PBS, ISO and PE and the amounts of RNA used to make cDNA library. PBS ( $n = 3$ ), ISO ( $n = 3$ ) and PE ( $n = 3$ ).

**Table S1.** Qualification of total RNA purified from blood serum EVs for basal characterization of blood EVs. ( $n = 5$ )

| Mouse ID | Concentration (ng/ $\mu$ L) | 260/280<br>(Ratio) | 260/230 (Ratio) |
|----------|-----------------------------|--------------------|-----------------|
| # 6      | 10                          | 1.41               | 0.51            |
| # 7      | 12                          | 1.49               | 0.06            |
| # 8      | 14                          | 1.4                | 0.22            |
| # 9      | 9.3                         | 1.43               | 0.26            |
| # 10     | 17.4                        | 1.45               | 0.04            |
| Ave      | 12.54                       | 1.44               | 0.22            |
| STDEV    | 3.28                        | 0.04               | 0.19            |

**Table S2.** Ct values of SNORD95, SNORD96A, RNU6-2, miR 21-5p, miR 16-5p and GAPDH of in mouse blood EVs measured by real time-PCR for basal characterization of blood EVs. ( $n = 5$ ).

| Mouse ID | Ct Value of Non-Coding Small RNAs and GAPDH by RT-PCR |          |        |        |          |          |       |
|----------|-------------------------------------------------------|----------|--------|--------|----------|----------|-------|
|          | SNORD95                                               | SNORD96A | RNU6-2 | Ave Ct | miR21-5p | miR16-5p | GAPDH |
| # 6      | 28.27                                                 | 33.36    | 33.66  | 31.76  | 21.24    | 20.28    | 25.83 |
| # 7      | 29.33                                                 | 33.35    | 34.93  | 32.54  | 22.60    | 23.24    | 25.95 |
| # 8      | 28.47                                                 | 33.03    | 33.75  | 31.75  | 23.66    | 21.29    | 26.41 |
| # 9      | 29.86                                                 | 34.05    | 36.49  | 33.46  | 23.13    | 23.23    | 27.00 |
| # 10     | 29.85                                                 | 34.53    | 35.40  | 33.26  | 23.21    | 23.92    | 26.44 |
| Ave      | 29.15                                                 | 33.67    | 34.84  | 32.55  | 22.77    | 22.39    | 26.33 |
| STDEV    | 0.75                                                  | 0.61     | 1.19   | 0.81   | 0.93     | 1.54     | 0.46  |

**Table S3.** Expression of the top 10 miRNAs in blood EV of mice with PBS, ISO and PE injection for 1 week. The Readcount and TPM values provided here are the average values of three biological replicates. ( $n = 3$ )

|                 | Readcount (ave) |         |         | TPM (ave) |         |         |
|-----------------|-----------------|---------|---------|-----------|---------|---------|
|                 | ISO             | PBS     | PE      | ISO       | PBS     | PE      |
| mmu-miR-451a    | 300,671         | 397,360 | 61,577  | 160,589   | 119,593 | 58,788  |
| mmu-miR-486a-3p | 107,312         | 377,999 | 123,033 | 71,364    | 109,307 | 116,475 |
| mmu-miR-486a-5p | 107,177         | 376,634 | 122,004 | 71,226    | 108,954 | 115,469 |
| mmu-miR-486b-3p | 106,416         | 374,515 | 121,170 | 70,714    | 108,335 | 114,671 |
| mmu-miR-21a-5p  | 213,110         | 276,566 | 86,902  | 138,434   | 80,236  | 78,239  |
| mmu-let-7i-5p   | 25,864          | 110,784 | 15,520  | 20,014    | 32,735  | 14,657  |
| mmu-miR-92a-3p  | 15,471          | 72,343  | 17,649  | 11,723    | 20,776  | 16,483  |
| mmu-miR-148a-3p | 39,966          | 64,012  | 16,731  | 27,613    | 19,836  | 15,041  |
| mmu-let-7f-5p   | 19,890          | 58,817  | 13,553  | 15,067    | 17,737  | 12,879  |
| mmu-let-7a-5p   | 14,270          | 55,007  | 9,933   | 11,116    | 17,148  | 9,425   |
